# Supplementary material for: Enhanced photoluminescence in CaMoO4:Eu3+ by Gd3+ co-doping
Source: Royal Society of Chemistry journal article supplement (doi:10.1039/c3dt53408a), 2013-12-06
Supplement: c3dt53408a.pdf [file c3dt53408a.pdf]

## Enhanced Photoluminescence in $\text{CaMoO}_4:\text{Eu}^{3+}$ by $\text{Gd}^{3+}$ co-doping

B. P. Singh,<sup>a</sup> A. K. Parchur,<sup>b\*</sup> R. S. Ningthoujam,<sup>c</sup> A. A. Ansari,<sup>d</sup> P. Singh<sup>a</sup> and S. B. Rai<sup>b</sup>

<sup>a</sup>Department of Physics, Indian Institute of Technology (BHU), Varanasi, India-221005

<sup>b</sup>Department of Physics, Banaras Hindu University, Varanasi, India-221005

<sup>c</sup>Chemistry Division, Bhabha Atomic Research Centre, Mumbai, India-400085

<sup>d</sup>King Abdullah Institute for Nanotechnology, King Saud University, Riyadh, Saudi Arabia-11451

\*Corresponding author: [kareemskpa@hotmail.com](mailto:kareemskpa@hotmail.com) and [ak.parchur@usu.edu](mailto:ak.parchur@usu.edu)

Table S1 (ESI†) Peak positions of the magnetic dipole transition  ${}^5\text{D}_0 \rightarrow {}^7\text{F}_1$  and electric dipole transition  ${}^5\text{D}_0 \rightarrow {}^7\text{F}_2$  and their respective FWHM of ASP, 600 and 900 °C heated samples of  $\text{Gd}^{3+}$  ( $\text{Gd}^{3+} = 0, 2, 5, 7$  and 10 at.%) co-doped  $\text{CaMoO}_4:\text{Eu}$ .  $\lambda_{\text{exc}} = 266$  nm.

| $\text{Gd}^{3+}$<br>(at.%) | ASP                                                      |                                                          | 600 °C                                                   |                                                          | 900 °C                                                   |                                                          |
|----------------------------|----------------------------------------------------------|----------------------------------------------------------|----------------------------------------------------------|----------------------------------------------------------|----------------------------------------------------------|----------------------------------------------------------|
|                            | $({}^5\text{D}_0 \rightarrow {}^7\text{F}_1)$<br>/w (nm) | $({}^5\text{D}_0 \rightarrow {}^7\text{F}_2)$<br>/w (nm) | $({}^5\text{D}_0 \rightarrow {}^7\text{F}_1)$<br>/w (nm) | $({}^5\text{D}_0 \rightarrow {}^7\text{F}_2)$<br>/w (nm) | $({}^5\text{D}_0 \rightarrow {}^7\text{F}_1)$<br>/w (nm) | $({}^5\text{D}_0 \rightarrow {}^7\text{F}_2)$<br>/w (nm) |
| 0                          | 589.42/8.01                                              | 613.04/6.29                                              | 590.09/6.79                                              | 612.99/6.26                                              | 590.25/6.81                                              | 613.03/6.25                                              |
| 2                          | 589.07/8.61                                              | 612.98/6.38                                              | 590.22/6.82                                              | 612.98/6.31                                              | 590.27/6.83                                              | 612.99/6.25                                              |
| 5                          | 590.25/7.23                                              | 612.92/6.36                                              | 589.92/6.88                                              | 613.02/6.26                                              | 590.38/6.54                                              | 612.99/6.23                                              |
| 7                          | 589.94/7.16                                              | 612.96/6.35                                              | 590.03/7.17                                              | 612.98/6.35                                              | 590.26/6.67                                              | 612.99/6.23                                              |
| 10                         | 590.03/7.05                                              | 612.96/6.33                                              | 589.99/7.04                                              | 613.01/6.26                                              | 590.35/6.66                                              | 612.97/6.26                                              |

Table S2 (ESI†) Parameters obtained after mono-exponential fit to the decay data of as-prepared, 600 and 900 °C samples at 395 nm excitation.

| Sample | Gd <sup>3+</sup> (at.%) | $I_l$  | $\tau_l$ (ms) | $\chi^2$ |
|--------|-------------------------|--------|---------------|----------|
| ASP    | 0                       | 2.1416 | 0.4766        | 0.99979  |
|        | 5                       | 1.9459 | 0.5139        | 0.99969  |
|        | 10                      | 1.9807 | 0.4985        | 0.99982  |
| 600 °C | 0                       | 2.0645 | 0.5064        | 0.99983  |
|        | 5                       | 2.0363 | 0.5261        | 0.99987  |
|        | 10                      | 2.1239 | 0.4867        | 0.99991  |
| 900 °C | 0                       | 2.2791 | 0.46667       | 0.99996  |
|        | 5                       | 2.2793 | 0.4526        | 0.99988  |
|        | 10                      | 2.2999 | 0.4531        | 0.99996  |

Table S3 (ESI†) Radiative rate constants of Gd<sup>3+</sup> co-doped CaMoO<sub>4</sub>:Eu samples after mono-exponential curve fit to the luminescence decay curve under 395 excitation.

| Sample | Gd <sup>3+</sup> (at.%) | Radiative rate constant (x10 <sup>3</sup> s <sup>-1</sup> ) |
|--------|-------------------------|-------------------------------------------------------------|
| ASP    | 0                       | 2.09                                                        |
|        | 5                       | 1.95                                                        |
|        | 10                      | 2.01                                                        |
| 600 °C | 0                       | 1.97                                                        |
|        | 5                       | 1.90                                                        |
|        | 10                      | 2.05                                                        |
| 900 °C | 0                       | 2.14                                                        |
|        | 5                       | 2.21                                                        |
|        | 10                      | 2.21                                                        |

Table S4 (ESI†) Variation of CIE co-ordinates of ASP, 600 and 900 °C annealed Gd<sup>3+</sup> (0, 2, 5, 7 and 10 at.%) co-doped CaMoO<sub>4</sub>:Eu samples

| Gd <sup>3+</sup> (at.%) | CIE chromaticity co-ordinates |        |        |        |        |        |
|-------------------------|-------------------------------|--------|--------|--------|--------|--------|
|                         | ASP                           |        | 600 °C |        | 900 °C |        |
|                         | x                             | y      | x      | y      | x      | y      |
| 0                       | 0.4731                        | 0.3685 | 0.4726 | 0.3679 | 0.6127 | 0.3714 |
| 2                       | 0.5171                        | 0.3704 | 0.5171 | 0.3703 | 0.6205 | 0.3681 |
| 5                       | 0.5334                        | 0.3711 | 0.5331 | 0.3708 | 0.6068 | 0.3614 |
| 7                       | 0.5785                        | 0.3713 | 0.5785 | 0.3713 | 0.5979 | 0.3652 |
| 10                      | 0.5879                        | 0.3659 | 0.5879 | 0.3659 | 0.5937 | 0.3663 |

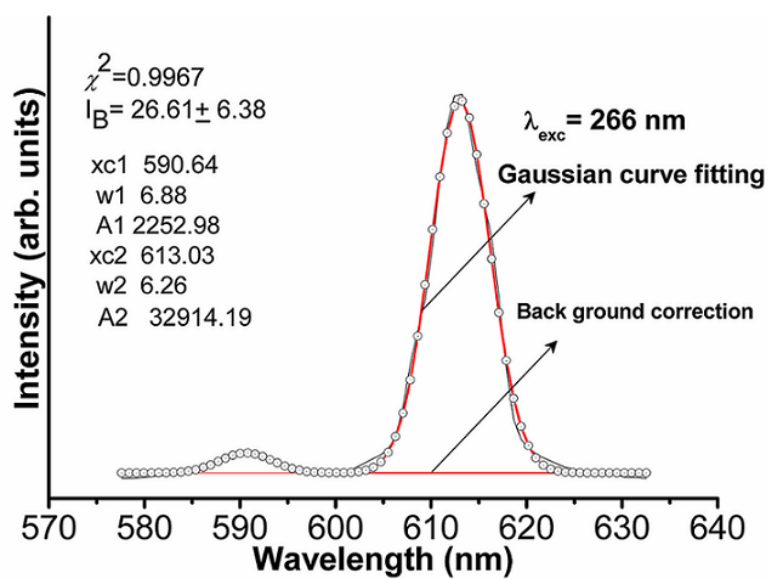

Fig. S1 (ESI†) Show the typical fitting of magnetic and electronic dipole transitions of 5 at.% Gd<sup>3+</sup> co-doped CaMoO<sub>4</sub>:Eu heated at 600 °C

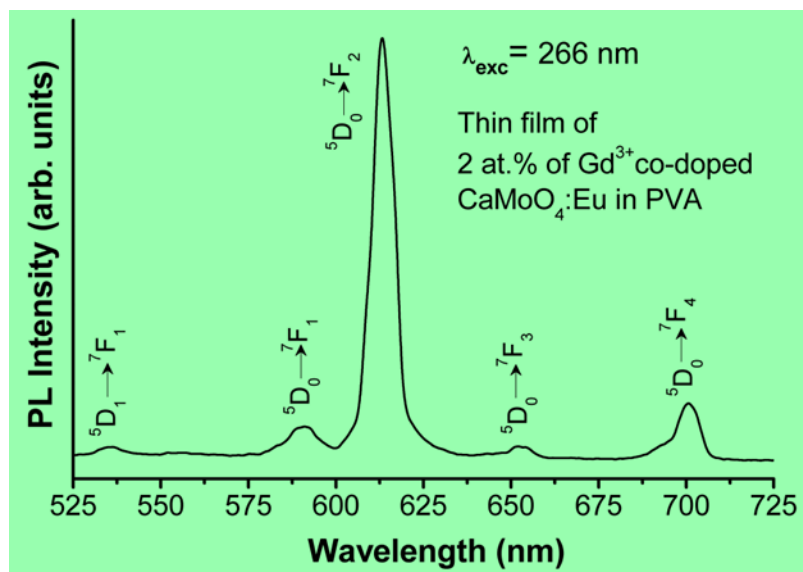

Fig. S2(ESI†) Luminescence spectra of PVA thin film of 2 at.%  $\text{Gd}^{3+}$  co-doped  $\text{CaMoO}_4:\text{Eu}$  nanoparticles after incorporation of re-dispersed particles at 266 nm excitation.

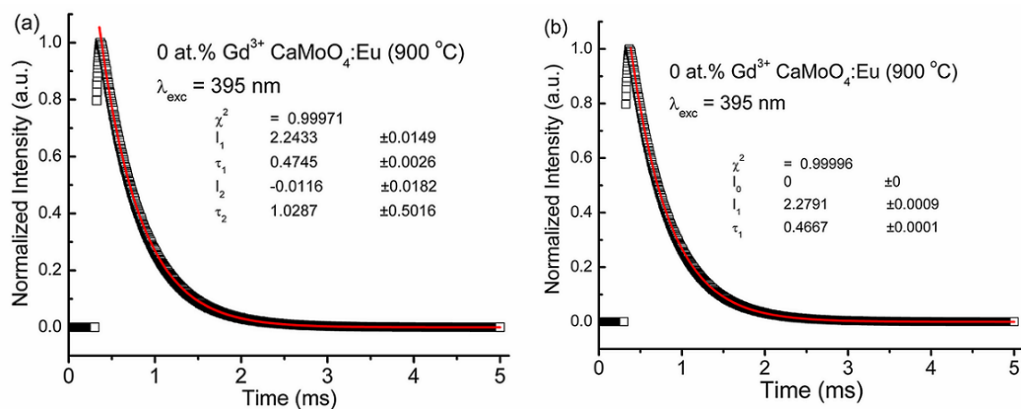

Fig. S3 (a) Bi- (b) mono-exponential curve fits to luminescence decay curve (613 nm) of 0 at. %  $\text{Gd}^{3+}$  co-doped  $\text{CaMoO}_4:\text{Eu}$  annealed at  $900\text{ }^\circ\text{C}$  ( $\lambda_{\text{exc}} = 395\text{ nm}$ ).

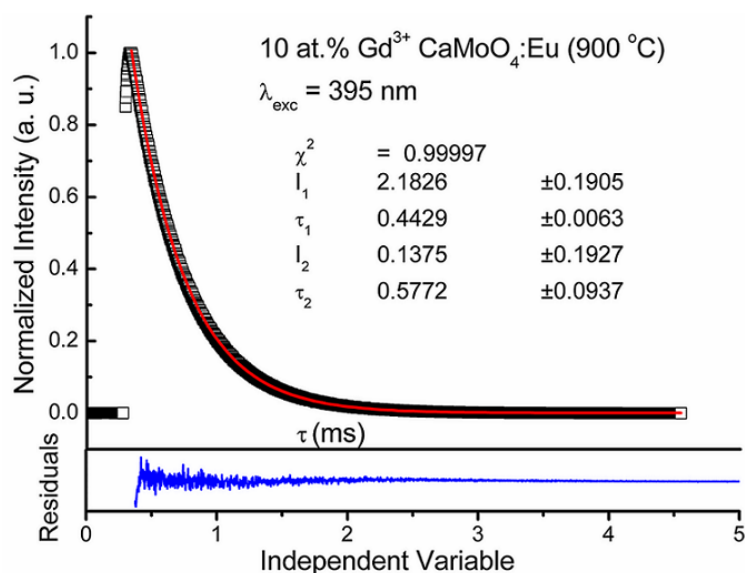

Fig. S4 Typical Bi-exponential fitting with residuals to the luminescence decay curve (613 nm) of 10 at.%  $\text{Gd}^{3+}$  co-doped  $\text{CaMoO}_4:\text{Eu}$  annealed at  $900\text{ }^\circ\text{C}$  ( $\lambda_{\text{exc}} = 395\text{ nm}$ ). Bottom portion of figure show the *residual vs. Independent Variable*.
